# Supplementary material
Source: MDPI journal article supplement (https://www.mdpi.com/2313-0105/10/4/132)
Supplement: s1 [file s1]

Archive with 2 entries (2 files):
- batteries-2931247-supplementary.pdf
- batteries-2931247-supplementary.xlsx
