# Supplementary material
Source: MDPI journal article supplement (https://www.mdpi.com/2313-0105/10/4/132)
Supplement: s1 [file s1 › batteries-2931247-supplementary.xlsx]

## Sheet: Tabelle1
	Sample-200
	2theta [deg]	d [A]	I/I0	Counts	FWHM total	FWHM instr.	FWHM sample	Crystallite size [A]	Crystallite size [nm]
	26.04	3.4191	570.4	305	0.2311	0.1322	0.0989	860.7	86.07
	27.42	3.2501	542.1	324	0.263	0.1343	0.1287	663.6	66.36
	29.1	3.0662	597.2	355	0.2615	0.1365	0.125	685.7	68.57
	29.88	2.9879	869.8	491	0.2481	0.1375	0.1106	776.6	77.66
	31.14	2.8698	322.2	199	0.271	0.1407	0.1303	661	66.1
	47.67	1.9062	227	159	0.3078	0.205	0.1028	882.6	88.26
							mean	755.033	75.5033
							std	91.2079	9.12079
	Sample-100
	2theta [deg]	d [A]	I/I0	Counts	FWHM total	FWHM instr.	FWHM sample	Crystallite size [A]	Crystallite size [nm]
	26.1	3.4114	614.2	313	0.2343	0.1323	0.102	834.9	83.49
	27.51	3.2397	566.9	336	0.2726	0.1344	0.1383	617.8	61.78
	29.19	3.0569	651.2	359	0.254	0.1366	0.1174	730.5	73.05
	29.97	2.9791	930.7	504	0.2494	0.1376	0.1118	768.1	76.81
	31.23	2.8617	340.4	201	0.2723	0.141	0.1314	655.7	65.57
	47.79	1.9017	246.2	175	0.3279	0.203	0.1249	726.8	72.68
							mean	722.3	72.23
							std	70.9691	7.09691
	Sample-50
	2theta [deg]	d [A]	I/I0	Counts	FWHM total	FWHM instr.	FWHM sample	Crystallite size [A]	Crystallite size [nm]
	26.12	3.4088	614.3	341	0.2816	0.1323	0.1493	570.7	57.07
	27.47	3.2443	547.7	333	0.3085	0.1343	0.1742	490.4	49.04
	29.21	3.0549	642.3	399	0.3148	0.1367	0.1781	481.4	48.14
	29.99	2.9772	876.7	519	0.3004	0.1376	0.1628	527.5	52.75
	31.19	2.8653	360.1	203	0.2864	0.1408	0.1456	591.7	59.17
	47.72	1.9043	246.9	202	0.4147	0.2042	0.2105	430.9	43.09
							mean	515.433	51.5433
							std	54.6922	5.46922
